# Supplementary material for: Are we underestimating the genetic variances of dimorphic traits?
Source: PubMed Central journal article supplement (PMC4328764; doi:10.1002/ece3.1361), 2015-01-08
Supplement: ece30005-0590-sd1.pdf [file ece30005-0590-sd1.pdf]

### Supporting Information

#### ARE WE UNDERESTIMATING THE GENETIC VARIANCES OF DIMORPHIC TRAITS?

Wolak, M.E.\* , D.A. Roff, and D.J. Fairbairn

\*Corresponding author: Matthew Wolak; Address: School of Biological Sciences, Zoology Building, University of Aberdeen, Tillydrone Avenue, Aberdeen AB24 2TZ, UK. E-mail: matthew.wolak@abdn.ac.uk. Phone: +44 1224 273255.

#### S1 Univariate and bivariate animal models

##### *Univariate model*

A univariate animal model of a trait expressed in two morphs within the population can be specified as:

$$\mathbf{y} = \mathbf{X}\boldsymbol{\beta} + \mathbf{Z}_a\mathbf{a} + \mathbf{e} \quad (\text{S1.1})$$

When every individual has only one measurement,  $\mathbf{y}$  is a  $nx1$  vector of phenotypes in a population of  $n$  individuals and  $\mathbf{X}$  is a  $nx f$  design matrix (i.e., contains 0s and 1s), where  $f$  is the number of levels of fixed effects in the model, and contains 1s in rows occupied by observations with a particular level of the fixed effect in the  $f$ th column. The matrix  $\mathbf{X}$  relates the observation in  $\mathbf{y}$  to the appropriate fixed effect (mean) in  $\boldsymbol{\beta}$ . If morph is included as a fixed effect to account for differences in mean phenotype, then  $\mathbf{X}$  contains 1s in the first column at rows occupied by morph M1 (corresponding to rows in  $\mathbf{y}$ ) and 1s in the second column at rows occupied by morph M2. The matrix  $\mathbf{Z}_a$  is an  $nxn$  design matrix which associates the phenotypic observation in  $\mathbf{y}$  to the breeding value in  $\mathbf{a}$ . The variables  $\mathbf{a}$  and  $\mathbf{e}$  are the  $nx1$  vectors of additive genetic effects and environmental effects, respectively. The random variables  $\mathbf{a}$

Wolak et al., Are we underestimating genetic variances?

and  $\mathbf{e}$  are assumed normally distributed with means of zero and variances of  $Var(\mathbf{a})=\mathbf{G}_a \otimes \mathbf{A}$ , where  $\mathbf{A}$  is the additive genetic relationship matrix ( $\otimes$  symbolizes the direct product between two matrices), and  $Var(\mathbf{e})=\mathbf{R} \otimes \mathbf{I}$ , where  $\mathbf{I}$  is an identity matrix ( $n \times n$ , with 1s along the diagonal). In this model,  $\mathbf{G}_a = \sigma_a^2$  where  $\sigma_a^2$  is the additive genetic variance in the base population and  $\mathbf{R} = \sigma_e^2$ , the environmental variance.

### *Bivariate model*

A bivariate model of a trait expressed in two morphs within the population can be specified as:

$$\begin{bmatrix} \mathbf{y}_1 \\ \mathbf{y}_2 \end{bmatrix} = \begin{bmatrix} \mathbf{X}_1 & \mathbf{0} \\ \mathbf{0} & \mathbf{X}_2 \end{bmatrix} \begin{bmatrix} \boldsymbol{\beta}_1 \\ \boldsymbol{\beta}_2 \end{bmatrix} + \begin{bmatrix} \mathbf{Z}_{a1} & \mathbf{0} \\ \mathbf{0} & \mathbf{Z}_{a2} \end{bmatrix} \begin{bmatrix} \mathbf{a}_1 \\ \mathbf{a}_2 \end{bmatrix} + \begin{bmatrix} \mathbf{e}_1 \\ \mathbf{e}_2 \end{bmatrix} \quad (\text{S1.2})$$

In equation S1.2,  $\mathbf{a}$  (the bivariate distribution of  $\mathbf{a}_1$  and  $\mathbf{a}_2$ ) and  $\mathbf{e}$  (the bivariate distribution of  $\mathbf{e}_1$  and  $\mathbf{e}_2$ ) are assumed to represent random effects described by multivariate normal distributions. The  $Var(\mathbf{a})=\mathbf{G}_a \otimes \mathbf{A}$ , where  $\mathbf{G}_a$  is a 2x2 matrix (see equation 3 in main text).

## **S2 Literature search**

To evaluate the extent to which morph-specific estimates of additive genetic variances are estimated in the literature, we sampled four journals that present the majority of estimates of additive genetic variances in evolutionary ecology: *Evolution*, *the American Naturalist*, *Journal of Evolutionary Biology*, and *Heredity*. For each journal we included the issues for January through December 2013 and January through October 2014 (22 months). We read the title, abstract, and keywords of every paper published in this sample to determine if genetic variances or heritabilities were estimated. If yes, we read the full paper and categorized it according to: (1) the type of trait studied (monomorphic, dimorphic, or polymorphic), (2) whether morph was included in the statistical analysis, (3) whether morph was included as a fixed effect, (4) whether a bivariate model of both morphs (or multivariate in the case of a polymorphism) was used to estimate morph-specific genetic variances, and (5) whether morphs were analyzed in separate statistical models (regardless of how the study was categorized in 4).

We considered morph was included as a fixed effect (3) if it was either entered directly in the statistical model as a fixed effect or if the raw phenotypic data were mean centered across morphs before analyses (effectively the same as including fixed effect in the model). Similarly, we considered the morph to be modeled using a bivariate model (4) if the morphs were entered as separate traits or if a random interaction with morph was included (e.g., morph-by-sire family in a sire variance component model or morph-by-identity in an animal model). Finally, we did not include papers that either estimated additive genetic variances and heritabilities from simulated data or estimated mutational genetic variances.

**Table S2.1** Results from the literature sample

| Ref. | Organism                                                  | Trait(s)                                                            | 1-Morph                 | 2-Morph in analysis | 3-Fixed effect              | 4-Bivariate model           | 5-Separate morph models |
|------|-----------------------------------------------------------|---------------------------------------------------------------------|-------------------------|---------------------|-----------------------------|-----------------------------|-------------------------|
| 1    | <i>Hyla versicolor</i>                                    | advertisement call                                                  | Dimorphic               | yes                 | yes                         | no                          | no                      |
| 2    | <i>Agalychnis callidryas</i>                              | risk-induced hatching timing & morphology                           | Dimorphic               | yes                 | yes                         | yes                         | no                      |
| 3    | <i>Tyto alba</i>                                          | color spots                                                         | Dimorphic               | yes                 | yes                         | no                          | no                      |
| 4    | <i>Tyto alba</i>                                          | nestling vocalizations                                              | Dimorphic               | yes                 | yes                         | no                          | no                      |
| 5    | <i>Hirundo rustica</i>                                    | flight initiation distance                                          | Polymorphic             | no                  | no                          | no                          | no                      |
| 6    | <i>Cyanistes caeruleus</i>                                | egg characteristics                                                 | Polymorphic             | yes                 | yes                         | yes                         | no                      |
| 7    | <i>Cyanistes caeruleus</i>                                | body mass                                                           | Polymorphic             | yes                 | yes                         | yes                         | no                      |
| 8    | <i>Ficedula albicollis</i>                                | tail, tarsus, wing, & mass                                          | Dimorphic               | yes                 | yes                         | no                          | no                      |
| 9    | <i>Ficedula albicollis</i> and <i>Taeniopygia guttata</i> | morphology & sexually selected traits                               | Dimorphic               | yes                 | yes                         | no                          | no                      |
| 10   | <i>Falco tinnunculus</i>                                  | coloration, body mass, & immunity                                   | Dimorphic & Polymorphic | yes                 | yes                         | no                          | no (age) yes (sex)      |
| 11   | <i>Acrocephalus arundinaceus</i>                          | wing tarsus length                                                  | Dimorphic               | yes                 | yes                         | yes                         | yes                     |
| 12   | <i>Parus major</i>                                        | oxidative damage & resistance to oxidative stress                   | Dimorphic               | yes                 | yes                         | yes                         | yes                     |
| 13   | <i>Parus major</i>                                        | clutch size                                                         | Monomorphic             | NA                  | NA                          | NA                          | NA                      |
| 14   | <i>Parus major</i>                                        | gonad size                                                          | Polymorphic             | yes                 | yes                         | yes                         | yes                     |
| 15   | <i>Parus major</i>                                        | egg-laying dates (female)                                           | Dimorphic               | yes                 | yes                         | yes                         | no                      |
| 16   | <i>Parus major</i> and <i>Taeniopygia guttata</i>         | plumage & beak color                                                | Dimorphic               | yes                 | yes                         | no                          | no                      |
| 17   | <i>Anser anser</i>                                        | dominance rank & aggression                                         | Dimorphic               | yes                 | yes                         | yes                         | yes                     |
| 18   | <i>Perisoreus infaustus</i>                               | body mass                                                           | Dimorphic               | yes                 | yes                         | no                          | no                      |
| 19   | <i>Melospiza melodia</i>                                  | female extra-pair reproduction and male paternity success           | Monomorphic             | NA                  | NA                          | NA                          | NA                      |
| 20   | <i>Melospiza melodia</i>                                  | male reproductive success                                           | Monomorphic             | NA                  | NA                          | NA                          | NA                      |
| 21   | <i>Larus michahellis</i>                                  | antioxidant defence, endocrine signal, & body mass                  | Dimorphic               | yes                 | yes                         | yes                         | yes                     |
| 22   | <i>Taeniopygia guttata</i>                                | neural traits associated with song morphology, male sexual activity | Dimorphic               | yes                 | yes (resources)<br>no (sex) | yes (resources)<br>no (sex) | no                      |
| 23   | <i>Taeniopygia guttata</i>                                | & basal metabolic rate                                              | Dimorphic & Polymorphic | yes                 | yes                         | yes                         | no                      |
| 24   | <i>Hippopodina iririkiensis</i>                           | fitness                                                             | Polymorphic             | yes                 | yes                         | yes                         | yes                     |
| 25   | <i>Heliocidaris erythrogramma armigera</i>                | fertilization & hatching success                                    | Dimorphic               | yes                 | yes                         | yes                         | no                      |

|    |                                              |                                                                                   |                         |     |     |                        |     |
|----|----------------------------------------------|-----------------------------------------------------------------------------------|-------------------------|-----|-----|------------------------|-----|
| 26 | <i>Gasterosteus aculeatus</i>                | survival & body size                                                              | Polymorphic             | yes | yes | yes                    | no  |
| 27 | <i>Salmo salar</i>                           | fitness                                                                           | Dimorphic               | yes | yes | no                     | yes |
| 28 | <i>Salmo salar</i>                           | morphology                                                                        | Dimorphic               | yes | yes | yes                    | no  |
| 29 | <i>Gasterosteus aculeatus</i>                | body size & shape                                                                 | Dimorphic & Polymorphic | yes | yes | (environment) (sex) no | no  |
| 30 | <i>Lasius niger</i>                          | cuticular hydrocarbons, fertility, & head size                                    | Dimorphic               | yes | no  | no                     | yes |
| 31 | <i>Grylloides sigillatus</i>                 | oxidative damage, antioxidant protection, reproductive effort, lifespan, & ageing | Dimorphic               | yes | ?   | yes                    | no  |
| 32 | <i>Grylloides sigillatus</i>                 | female spermatophylax feeding behavior & amino acid composition                   | Monomorphic             | NA  | NA  | NA                     | NA  |
| 33 | <i>Teleogryllus commodus</i>                 | mate choice                                                                       | Dimorphic               | yes | yes | yes                    | no  |
| 34 | <i>Gnatocerus cornutus</i>                   | mandable size & locomotor activity                                                | Dimorphic               | yes | no  | no                     | yes |
| 35 | <i>Sepsis punctum</i>                        | development rate                                                                  | Dimorphic & Polymorphic | yes | yes | yes                    | no  |
| 36 | <i>Drosophila melanogaster</i>               | macronutrient preferences                                                         | Dimorphic               | yes | ?   | yes                    | no  |
| 37 | <i>Drosophila simulans</i>                   | cuticular hydrocarbons                                                            | Dimorphic               | yes | yes | no                     | yes |
| 38 | <i>Drosophila yakuba</i> and <i>santomea</i> | pigmentation                                                                      | Dimorphic               | yes | yes | no                     | yes |
| 39 | <i>Drosophila melanogaster</i>               | egg-to-adult viability                                                            | Dimorphic               | yes | yes | yes                    | no  |
| 40 | <i>Drosophila melanogaster</i>               | lifespan                                                                          | Dimorphic               | yes | yes | yes                    | no  |
| 41 | <i>Drosophila melanogaster</i>               | cuticular hydrocarbons                                                            | Dimorphic               | yes | yes | yes                    | no  |
| 42 | <i>Drosophila serrata</i>                    | mating preferences                                                                | Dimorphic               | yes | yes | yes                    | no  |
| 43 | <i>Drosophila simulans</i>                   | cuticular hydrocarbons                                                            | Dimorphic               | yes | yes | yes                    | yes |
| 44 | <i>Drosophila serrata</i>                    | fitness                                                                           | Dimorphic & Polymorphic | yes | yes | yes                    | yes |
| 45 | <i>Drosophila serrata</i>                    | contact pheromones                                                                | Dimorphic & Polymorphic | yes | yes | yes                    | no  |
| 46 | <i>Drosophila melanogaster</i>               | fecundity & copula duration                                                       | Monomorphic             | NA  | NA  | NA                     | NA  |
| 47 | <i>Drosophila serrata</i>                    | cuticular hydrocarbons                                                            | Monomorphic             | NA  | NA  | NA                     | NA  |
| 48 | <i>Drosophila simulans</i>                   | heat tolerance                                                                    | Monomorphic             | NA  | NA  | NA                     | NA  |
| 49 | <i>Drosophila serrata</i>                    | cuticular hydrocarbons                                                            | Polymorphic             | yes | yes | no                     | yes |
| 50 | <i>Drosophila simulans</i>                   | cuticular hydrocarbons                                                            | Polymorphic             | yes | yes | yes                    | no  |
| 51 | <i>Melitaea cinxia</i>                       | metabolic rates                                                                   | Dimorphic               | yes | yes | no                     | yes |
| 52 | <i>Tenebrio molitor</i>                      | immune response, melanisation, & morphology                                       | Dimorphic & Polymorphic | yes | ?   | yes                    | no  |

|    |                                 |                                                         |                         |     |     |     |     |
|----|---------------------------------|---------------------------------------------------------|-------------------------|-----|-----|-----|-----|
| 53 | <i>Tribolium castaneum</i>      | external immune defences                                | Monomorphic             | NA  | NA  | NA  | NA  |
| 54 | <i>Tribolium castaneum</i>      | growth & life history                                   | Polymorphic             | yes | yes | yes | no  |
| 55 | <i>Gryllus firmus</i>           | melanization, ovary/testis mass & DLM mass              | Dimorphic & Polymorphic | yes | yes | yes | yes |
| 56 | <i>Callosobruchus maculatus</i> | fitness                                                 | Dimorphic               | yes | no  | yes | no  |
| 57 | <i>Nauphoeta cinerea</i>        | discontinuous gas exchange, metabolic rate, & body mass | Dimorphic               | yes | yes | no  | yes |
| 58 | <i>Enchenopa binotata</i>       | female mate preference                                  | Monomorphic             | NA  | NA  | NA  | NA  |
| 59 | <i>Enchenopa binotata</i>       | mate preferences                                        | Monomorphic             | NA  | NA  | NA  | NA  |
| 60 | <i>Bemisia tabaci</i>           | survival & fecundity                                    | Dimorphic               | yes | yes | no  | yes |
| 61 | <i>Bos taurus</i>               | social dominance                                        | Monomorphic             | NA  | NA  | NA  | NA  |
| 62 | <i>Homo sapiens</i>             | ages at first & last reproduction                       | Dimorphic               | yes | ?   | yes | yes |
| 63 | <i>Homo sapiens</i>             | metabolic profiles                                      | Monomorphic             | NA  | NA  | NA  | NA  |
| 64 | laboratory house mice           | wheel running behavior                                  | Dimorphic               | yes | yes | yes | yes |
| 65 | <i>Suricata suricatta</i>       | growth & size                                           | Dimorphic               | yes | yes | yes | yes |
| 66 | <i>Ovis aries</i>               | antibody titer & body weight                            | Polymorphic             | yes | yes | yes | no  |
| 67 | <i>Saimiri boliviensis</i>      | neonate mass                                            | Dimorphic               | yes | yes | yes | no  |
| 68 | <i>Ipomoea purpurea</i>         | fitness & tolerance to competition                      | Dimorphic               | yes | yes | yes | no  |
| 69 | <i>Plantago coronopus</i>       | reproductive & vegetative traits                        | Dimorphic & Polymorphic | yes | yes | yes | no  |
| 70 | <i>Solanum carolinense</i>      | resistance to herbivory                                 | Monomorphic             | NA  | NA  | NA  | NA  |
| 71 | <i>Pinus pinaster</i>           | early seedling performance                              | Dimorphic               | yes | yes | yes | no  |
| 72 | <i>Ipomoea hederacea</i>        | size, flowering time, & seed number                     | Monomorphic             | NA  | NA  | NA  | NA  |
| 73 | <i>Arabidopsis lyrata</i>       | seed size                                               | Monomorphic             | NA  | NA  | NA  | NA  |
| 74 | <i>Geranium carolinianum</i>    | competitive ability                                     | Polymorphic             | yes | no  | yes | no  |
| 75 | <i>Arabidopsis lyrata</i>       | plant performance & coping with drought                 | Polymorphic             | yes | yes | no  | yes |
| 76 | <i>Arabidopsis thaliana</i>     | 13 varied traits                                        | Polymorphic             | yes | yes | yes | yes |
| 77 | <i>Pinus radiata</i>            | resistance to herbivores                                | Dimorphic               | yes | yes | yes | no  |
| 78 | <i>Eucalyptus globulus</i>      | disease resistance                                      | Polymorphic             | yes | yes | yes | no  |
| 79 | <i>Schistocephalus solidus</i>  | fitness                                                 | Monomorphic             | NA  | NA  | NA  | NA  |

### Literature Cited for Table S2.1

1. Welch, A. M., Smith, M. J., & Gerhardt, H. C. (2014). A multivariate analysis of genetic variation in the advertisement call of the gray treefrog, *Hyla versicolor*. *Evolution*, *68*(6), 1629–39. doi:10.1111/evo.12397
2. Gomez-Mestre, I., & Warkentin, K. M. (2013). Risk-induced hatching timing shows low heritability and evolves independently of spontaneous hatching in red-eyed treefrogs. *Journal of Evolutionary Biology*, *26*(5), 1079–1089. doi:10.1111/jeb.12121
3. Steinsland, I., Larsen, C. T., Roulin, A., & Jensen, H. (2014). Quantitative genetic modeling and inference in the presence of nonignorable missing data. *Evolution*, *68*(6), 1735–1747. doi:10.1111/evo.12380
4. Dreiss, A.N., Ruppli, C.A., & Roulin, A. (2013). Individual vocal signatures in barn owl nestlings: does individual recognition have an adaptive role in sibling vocal competition? *Journal of Evolutionary Biology*, *27*, 63–75. doi:10.1111/jeb.12277
5. Møller, A. P. (2014). Life history, predation and flight initiation distance in a migratory bird. *Journal of Evolutionary Biology*, *27*(6), 1105–1113. doi:10.1111/jeb.12399
6. Hadfield, J. D., Heap, E.A., Bayer, F., Mittell, E.A., & Crouch, N.M.A. (2013b). Intraclutch differences in egg characteristics mitigate the consequences of age-related hierarchies in a wild passerine. *Evolution*, *67*(9), 2688–2700. doi:10.1111/evo.12143
7. Hadfield, J. D., Heap, E.A., Bayer, F., Mittell, E.A., & Crouch, N. M.A. (2013a). Disentangling genetic and prenatal sources of familial resemblance across ontogeny in a wild passerine. *Evolution*, *67*(9), 2701–2713. doi:10.1111/evo.12144
8. Bjorklund, M., Husby, A., & Gustafsson, L. (2013). Rapid and unpredictable changes of the G-matrix in a natural bird population over 25 years. *Journal of Evolutionary Biology*, *26*, 1–13. doi:10.1111/jeb.12044
9. Husby, A., Schielzeth, H., Forstmeier, W., Gustafsson, L., & Qvarnstrom, A. (2013). Sex chromosome linked genetic variance and the evolution of sexual dimorphism of quantitative traits. *Evolution*, *67*(3), 609–619. doi:10.5061/dryad.3hq60
10. Kim, S.-Y., Fargallo, J. A., Vergara, P., & Martinez-Padilla, J. (2013). Multivariate heredity of melanin-based coloration, body mass and immunity. *Heredity*, *111*(2), 139–146. doi:10.1038/hdy.2013.29
11. Tarka, M., Akesson, M., Hasselquist, D., & Hansson, B. (2014). Intralocus sexual conflict over wing length in a wild migratory bird. *The American Naturalist*, *183*(1), 62–73. doi:10.1086/674072
12. Losdat, S., Helfenstein, F., Blount, J. D., & Richner, H. (2014). Resistance to oxidative stress shows low heritability and high common environmental variance in a wild bird. *Journal of Evolutionary Biology*, *27*, 1990–2000. doi:10.1111/jeb.12454
13. Nicolaus, M., Brommer, J. E., Ubels, R., Tinbergen, J. M., & Dingemanse, N. J. (2013). Exploring patterns of variation in clutch size-density reaction norms in a wild passerine bird. *Journal of Evolutionary Biology*, *26*(9), 2031–2043. doi:10.1111/jeb.12210
14. Schaper, S. V., Gienapp, P., Dawson, A., & Visser, M. E. (2013). Heritability of gonad size varies across season in a wild songbird. *Journal of Evolutionary Biology*, *26*(12), 2739–2745. doi:10.1111/jeb.12249

15. Gienapp, P., van Noordwijk, A.J., & Visser, M. E. (2013). Genetic background, and not ontogenetic effects, affects avian seasonal timing of reproduction. *Journal of Evolutionary Biology*, *26*(10), 2147–2153. doi:10.1111/jeb.12205
16. Evans, S. R., Schielzeth, H., Forstmeier, W., Sheldon, B. C., & Husby, A. (2014). Nonautosomal genetic variation in carotenoid coloration. *The American Naturalist*, *184*(3), 374–383. doi:10.1086/677397
17. Weiß, B. M., & Foerster, K. (2013). Age and sex affect quantitative genetic parameters for dominance rank and aggression in free-living greylag geese. *Journal of Evolutionary Biology*, *26*(2), 299–310. doi:10.1111/jeb.12042
18. Gienapp, P., & Merilä, J. (2014). Disentangling plastic and genetic changes in body mass of Siberian jays. *Journal of Evolutionary Biology*, *27*, 1849–1858. doi:10.1111/jeb.12438
19. Reid, J. M., Arcese, P., Keller, L. F., & Losdat, S. (2014). Female and male genetic effects on offspring paternity: additive genetic (co)variances in female extra-pair reproduction and male paternity success in song sparrows (*Melospiza melodia*). *Evolution*, *68*(8), 2357–2370. doi:10.1111/evo.12424
20. Reid, J. M., Arcese, P., & Losdat, S. (2014). Genetic covariance between components of male reproductive success: within-pair vs. extra-pair paternity in song sparrows. *Journal of Evolutionary Biology*, *27*(10), 2046–56. doi:10.1111/jeb.12445
21. Kim, S.-Y., Noguera, J. C., Tato, A., & Velando, A. (2013). Vitamins, stress and growth: the availability of antioxidants in early life influences the expression of cryptic genetic variation. *Journal of Evolutionary Biology*, *26*(6), 1341–1352. doi:10.1111/jeb.12136
22. Woodgate, J. L., Buchanan, K. L., Bennett, A. T. D., Catchpole, C. K., Brighton, R., & Leitner, S. (2014). Environmental and genetic control of brain and song structure in the zebra finch. *Evolution*, *68*(1), 230–240. doi:10.1111/evo.12261
23. Mathot, K. J., Martin, K., Kempenaers, B., & Forstmeier, W. (2013). Basal metabolic rate can evolve independently of morphological and behavioural traits. *Heredity*, *111*(3), 175–81. doi:10.1038/hdy.2013.35
24. Monro, K., & Marshall, D. J. (2013). Evolutionary constraints and the maintenance of individual specialization throughout succession. *Evolution*, *67*(12), 3636–3644. doi:10.1111/evo.12220
25. Lymbery, R. a, & Evans, J. P. (2013). Genetic variation underlies temperature tolerance of embryos in the sea urchin *Heliocidaris erythrogramma armigera*. *Journal of Evolutionary Biology*, *26*(10), 2271–2282. doi:10.1111/jeb.12225
26. DeFaveri, J., & Merilä, J. (2014). Local adaptation to salinity in the three-spined stickleback? *Journal of Evolutionary Biology*, *27*(2), 290–302. doi:10.1111/jeb.12289
27. Houde, A.L., Wilson, C. C., & Neff, B. D. (2013). Genetic architecture of survival and fitness-related traits in two populations of Atlantic salmon. *Heredity*, *111*(6), 513–9. doi:10.1038/hdy.2013.74
28. Debes, P. V, Fraser, D. J., McBride, M. C., & Hutchings, J.A. (2013). Multigenerational hybridisation and its consequences for maternal effects in Atlantic salmon. *Heredity*, *111*(3), 238–47. doi:10.1038/hdy.2013.43
29. Ramler, D., Mitteroecker, P., Shama, L. N. S., Wegner, K. M., & Ahnelt, H. (2014). Nonlinear effects of temperature on body form and developmental canalization in the threespine stickleback. *Journal of Evolutionary Biology*, *27*, 497–507. doi:10.1111/jeb.12311



30. Holman, L., Linksvayer, T. A., & D'Ettoire, P. (2013). Genetic constraints on dishonesty and caste dimorphism in an ant. *The American Naturalist*, *181*(2), 161–170. doi:10.1086/668828
31. Archer, C. R., Sakaluk, S. K., Selman, C., Royle, N. J., & Hunt, J. (2013). Oxidative stress and the evolution of sex differences in life span and ageing in the decorated cricket, *Gryllobates sigillatus*. *Evolution*, *67*(3), 620–634. doi:10.5061/dryad.cs16k
32. Gershman, S. N., Hunt, J., & Sakaluk, S. K. (2013). Food fight: sexual conflict over free amino acids in the nuptial gifts of male decorated crickets. *Journal of Evolutionary Biology*, *26*(4), 693–704. doi:10.1111/jeb.12078
33. Hall, M. D., Lailvaux, S. P., & Brooks, R. C. (2013). Sex-specific evolutionary potential of pre- and postcopulatory reproductive interactions in the field cricket, *Teleogryllus commodus*. *Evolution*, *67*(6), 1831–1837. doi:10.1111/evo.12067
34. Fuchikawa, T., & Okada, K. (2013). Inter- and intrasexual genetic correlations of exaggerated traits and locomotor activity. *Journal of Evolutionary Biology*, *26*(9), 1979–1987. doi:10.1111/jeb.12197
35. Berger, D., Postma, E., Blanckenhorn, W. U., & Walters, R. J. (2013). Quantitative genetic divergence and standing genetic (co)variance in thermal reaction norms along latitude. *Evolution*, *67*(8), 2385–2399. doi:10.1111/evo.12138
36. Reddiex, A. J., Gosden, T. P., Bonduriansky, R., & Chenoweth, S. F. (2013). Sex-specific fitness consequences of nutrient intake and the evolvability of diet preferences. *The American Naturalist*, *182*(1), 91–102. doi:10.1086/670649
37. Ingleby, F. C., Hunt, J., & Hosken, D. J. (2013). Heritability of male attractiveness persists despite evidence for unreliable sexual signals in *Drosophila simulans*. *Journal of Evolutionary Biology*, *26*(2), 311–324. doi:10.1111/jeb.12045
38. Matute, D. R., & Harris, A. (2013). The influence of abdominal pigmentation on desiccation and ultraviolet resistance in two species of *Drosophila*. *Evolution*, *67*(8), 2451–2460. doi:10.1111/evo.12122
39. Ketola, T., Kellermann, V. M., Loeschke, V., López-Sepulcre, A., & Kristensen, T. N. (2014). Does environmental robustness play a role in fluctuating environments? *Evolution*, *68*(2), 587–594. doi:10.1111/evo.12285
40. Lehtovaara, A., Schielzeth, H., Flis, I., & Friberg, U. (2013). Heritability of life span is largely sex limited in *Drosophila*. *The American Naturalist*, *182*(5), 653–665. doi:10.1086/673296
41. Ingleby, F. C., Innocenti, P., Rundle, H. D., & Morrow, E. H. (2014). Between-sex genetic covariance constrains the evolution of sexual dimorphism in *Drosophila melanogaster*. *Journal of Evolutionary Biology*, *27*(8), 1721–1732. doi:10.1111/jeb.12429
42. Gosden, T. P., & Chenoweth, S. F. (2014). The evolutionary stability of cross-sex, cross-trait genetic covariances. *Evolution*, *68*(6), 1687–1697. doi:10.1111/evo.12398
43. Ingleby, F. C., Hosken, D. J., Flowers, K., Hawkes, M. F., Lane, S. M., Rapkin, J., Dworkin, I., & Hunt, J. (2013). Genotype-by-environment interactions for cuticular hydrocarbon expression in *Drosophila simulans*. *Journal of Evolutionary Biology*, *26*(1), 94–107. doi:10.1111/jeb.12030

44. Punzalan, D., Delcourt, M., & Rundle, H. D. (2014). Comparing the intersex genetic correlation for fitness across novel environments in the fruit fly, *Drosophila serrata*. *Heredity*, *112*(2), 143–148. doi:10.1038/hdy.2013.85
45. Gosden, T. P., Rundle, H. D., & Chenoweth, S. F. (2014). Testing the correlated response hypothesis for the evolution and maintenance of male mating preferences in *Drosophila serrata*. *Journal of Evolutionary Biology*, *27*(10), 2106–12. doi:10.1111/jeb.12461
46. Edward, D. A., Poissant, J., Wilson, A. J., & Chapman, T. (2014). Sexual conflict and interacting phenotypes: a quantitative genetic analysis of fecundity and copula duration in *Drosophila melanogaster*. *Evolution*, *68*(6), 1651–1660. doi:10.1111/evo.12376
47. Hine, E., McGuigan, K., & Blows, M. W. (2014). Evolutionary constraints in high-dimensional trait sets. *The American Naturalist*, *184*(1), 119–131. doi:10.1086/676504
48. Van Heerwaarden, B., & Sgrò, C. M. (2013). Multivariate analysis of adaptive capacity for upper thermal limits in *Drosophila simulans*. *Journal of Evolutionary Biology*, *26*(4), 800–809. doi:10.1111/jeb.12090
49. Aguirre, J. D., Hine, E., Mcguigan, K., & Blows, M. W. (2014). Comparing G : multivariate analysis of genetic variation in multiple populations. *Heredity*, *112*(1), 21–29. doi:10.1038/hdy.2013.12
50. Ingleby, F. C., Hosken, D. J., Flowers, K., Hawkes, M. F., Lane, S. M., Rapkin, J., House, C. M., Sharma, M. D., & Hunt, J. (2014). Environmental heterogeneity, multivariate sexual selection and genetic constraints on cuticular hydrocarbons in *Drosophila simulans*. *Journal of Evolutionary Biology*, *27*(4), 700–713. doi:10.1111/jeb.12338
51. Mattila, a L. K., & Hanski, I. (2014). Heritability of flight and resting metabolic rates in the Glanville fritillary butterfly. *Journal of Evolutionary Biology*, *27*(8), 1733–1743. doi:10.1111/jeb.12426
52. Prokkola, J., Roff, D., Kärkkäinen, T., Krams, I., & Rantala, M. J. (2013). Genetic and phenotypic relationships between immune defense, melanism and life-history traits at different temperatures and sexes in *Tenebrio molitor*. *Heredity*, *111*(2), 89–96. doi:10.1038/hdy.2013.20
53. Joop, G., Roth, O., Schmid-Hempel, P., & Kurtz, J. (2014). Experimental evolution of external immune defences in the red flour beetle. *Journal of Evolutionary Biology*, *27*(8), 1562–1571. doi:10.1111/jeb.12406
54. Irwin, K. K., & Carter, P. A. (2013). Constraints on the evolution of function-valued traits: a study of growth in *Tribolium castaneum*. *Journal of Evolutionary Biology*, *26*(12), 2633–2643. doi:10.1111/jeb.12257
55. Roff, D. A., & Fairbairn, D. J. (2013). The costs of being dark: the genetic basis of melanism and its association with fitness-related traits in the sand cricket. *Journal of Evolutionary Biology*, *26*(7), 1406–1416. doi:10.1111/jeb.12150
56. Berger, D., Grieshop, K., Lind, M. I., Goenaga, J., Maklakov, A. A., & Arnqvist, G. (2014). Intralocus sexual conflict and environmental stress. *Evolution*, *68*(8), 2184–2196. doi:10.1111/evo.12439
57. Schimpf, N. G., Matthews, P. G. D., & White, C. R. (2013). Discontinuous gas exchange exhibition is a heritable trait in speckled cockroaches *Nauphoeta cinerea*. *Journal of Evolutionary Biology*, *26*(7), 158815–97. doi:10.1111/jeb.12093
58. Rodríguez, R. L., Hallett, A. C., Kilmer, J. T., & Fowler-Finn, K. D. (2013). Curves as traits: genetic and environmental variation in mate preference functions. *Journal of Evolutionary Biology*, *26*(2), 434–442. doi:10.1111/jeb.12061

59. Rebar, D., & Rodríguez, R. L. (2014). Genetic variation in host plants influences the mate preferences of a plant-feeding insect. *The American Naturalist*, *184*(4), 489–99. doi:10.1086/677751
60. Díaz, F., Muñoz-Valencia, V., Juvinao-Quintero, D. L., Manzano-Martínez, M. R., Toro-Perea, N., Cárdenas-Henao, H., & Hoffmann, A. A. (2014). Evidence for adaptive divergence of thermal responses among *Bemisia tabaci* populations from tropical Colombia following a recent invasion. *Journal of Evolutionary Biology*, *27*(6), 1160–1171. doi:10.1111/jeb.12387
61. Sartori, C., & Mantovani, R. (2013). Indirect genetic effects and the genetic bases of social dominance : evidence from cattle. *Heredity*, *110*(1), 3–9. doi:10.1038/hdy.2012.56
62. Bürkli, A., & Postma, E. (2014). Genetic constraints underlying human reproductive timing in a premodern Swiss village. *Evolution*, *68*(2), 526–537. doi:10.1111/evo.12287
63. Alul, F. Y., Cook, D. E., Shchelochkov, O. A., Fleener, L. G., Berberich, S. L., Murray, J. C., & Ryckman, K. K. (2013). The heritability of metabolic profiles in newborn twins. *Heredity*, *110*(3), 253–8. doi:10.1038/hdy.2012.75
64. Careau, V., Wolak, M. E., Carter, P. A., & Garland, T. J. (2013). Limits to behavioral evolution: the quantitative genetics of a complex trait under directional selection. *Evolution*, *67*(11), 3102–19. doi:10.1111/evo.12200
65. Huchard, E., Charmantier, A., English, S., Bateman, A., Nielsen, J. F., & Clutton-Brock, T. (2014). Additive genetic variance and developmental plasticity in growth trajectories in a wild cooperative mammal. *Journal of Evolutionary Biology*, *27*(9), 1893–1904. doi:10.1111/jeb.12440
66. Hayward, A. D., Garnier, R., Watt, K. A., Pilkington, J. G., Grenfell, B. T., Matthews, J. B., Pemberton, J.M., Nussey, D. H., & Graham, A. L. (2014). Heritable, heterogeneous, and costly resistance of sheep against nematodes and potential feedbacks to epidemiological dynamics. *The American Naturalist*, *184*(Suppl), S58–76. doi:10.1086/676929
67. Blomquist, G. E., & Williams, L. E. (2013). Quantitative genetics of costly neonatal sexual size dimorphism in squirrel monkeys (*Saimiri boliviensis*). *Journal of Evolutionary Biology*, *26*(4), 756–765. doi:10.1111/jeb.12096
68. Chaney, L., & Baucom, R. S. (2014). The costs and benefits of tolerance to competition in *ipomoea purpurea*, the common morning glory. *Evolution*, *68*(6), 1698–16709. doi:10.1111/evo.12383
69. Hansen, C. F., García, M. B., & Ehlers, B. K. (2013). Water availability and population origin affect the expression of the tradeoff between reproduction and growth in *Plantago coronopus*. *Journal of Evolutionary Biology*, *26*(5), 993–1002. doi:10.1111/jeb.12114
70. Wise, M. J., & Rausher, M. D. (2013). Evolution of resistance to a multiple-herbivore community: genetic correlations, diffuse coevolution, and constraints on the plant’s response to selection. *Evolution*, *67*(6), 1767–1779. doi:10.1111/evo.12061
71. Zas, R., Cendán, C., & Sampedro, L. (2013). Mediation of seed provisioning in the transmission of environmental maternal effects in Maritime pine (*Pinus pinaster* Aiton). *Heredity*, *111*(3), 248–55. doi:10.1038/hdy.2013.44
72. Stinchcombe, J. R., Simonsen, A. K., & Blows, M. W. (2013). Estimating uncertainty in multivariate responses to selection. *Evolution*, *68*(4), 1188–1196. doi:10.1111/evo.12321

73. Willi, Y. (2013). The battle of the sexes over seed size: support for both kinship genomic imprinting and interlocus contest evolution. *The American Naturalist*, *181*(6), 787–798. doi:10.1086/670196
74. Shirk, R. Y., & Hamrick, J. L. (2014). Multivariate adaptation but no increase in competitive ability in invasive geranium carolinianum L. (Geraniaceae). *Evolution*, *68*(10), 2945–59. doi:10.1111/evo.12474
75. Paccard, A., Vance, M., & Willi, Y. (2013). Weak impact of fine-scale landscape heterogeneity on evolutionary potential in *Arabidopsis lyrata*. *Journal of Evolutionary Biology*, *26*(11), 2331–2340. doi:10.1111/jeb.12220
76. Tonsor, S. J., Elnaccash, T. W., & Scheiner, S. M. (2013). Developmental instability is genetically correlated with phenotypic plasticity, constraining heritability, and fitness. *Evolution*, *67*(10), 2923–2935. doi:10.1111/evo.12175
77. Moreira, X., Zas, R., & Sampedro, L. (2013). Additive genetic variation in resistance traits of an exotic pine species: little evidence for constraints on evolution of resistance against native herbivores. *Heredity*, *110*(5), 449–56. doi:10.1038/hdy.2012.108
78. Hamilton, M. G., Williams, D. R., Tilyard, P. A., Pinkard, E. A., Wardlaw, T. J., Glen, M., Vaillancourt, M. E., & Potts, B. M. (2013). A latitudinal cline in disease resistance of a host tree. *Heredity*, *110*(4), 372–9. doi:10.1038/hdy.2012.106
79. Benesh, D. P. (2013). Parental effects on the larval performance of a tapeworm in its copepod first host. *Journal of Evolutionary Biology*, *26*(8), 1625–1633. doi:10.1111/jeb.12165
